# Supplementary material for: Defect management and efficient photocatalytic water oxidation reaction over Mg modified SrNbO2N
Source: Royal Society of Chemistry journal article supplement (doi:10.1039/c8ta00767e), 2018-01-01
Supplement: c8ta00767e1.pdf [file c8ta00767e1.pdf]

## Supporting Information

### Defects Management and Efficient Photocatalytic Water Oxidation Reactions over Mg Modified SrNbO<sub>2</sub>N

Xiaoqin Sun<sup>a</sup>, Gang Liu<sup>b</sup> and Xiaoxiang Xu<sup>a,\*</sup>

<sup>a</sup>Shanghai Key Lab of Chemical Assessment and Sustainability, School of Chemical  
Science and Engineering, Tongji University, 1239 Siping Road, Shanghai, 200092,  
China, Email: [xxxu@tongji.edu.cn](mailto:xxxu@tongji.edu.cn), telephone: +86-21-65986919

<sup>b</sup>Shenyang National laboratory for Materials Science, Institute of Metal Research,  
Chinese Academy of Science, 72 Wenhua Road, Shenyang 110016, China

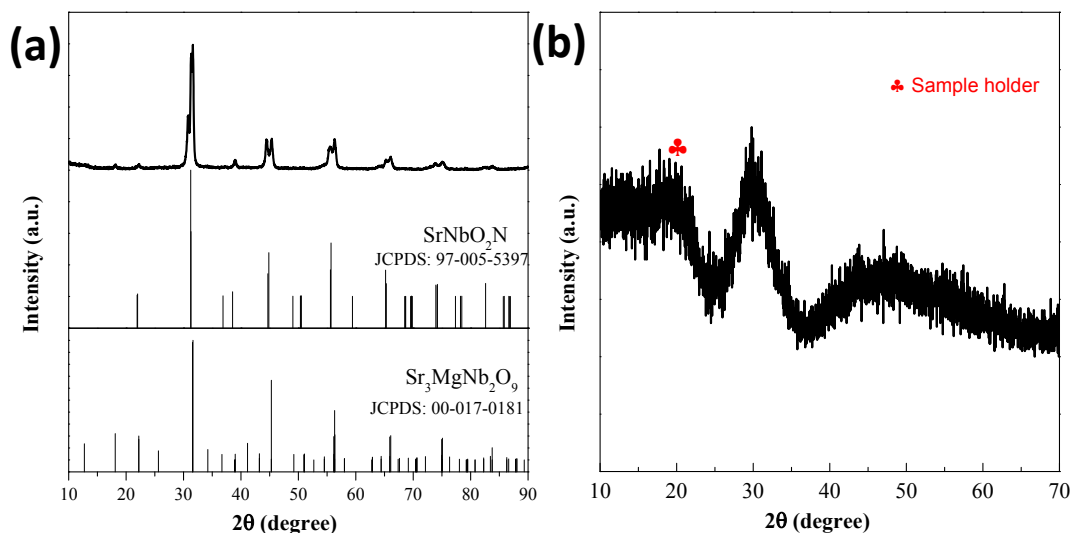

Figure S1. X-ray powder diffraction patterns of SrMg<sub>0.2</sub>Nb<sub>0.8</sub>O<sub>2+y</sub>N<sub>1-y</sub> from metal oxides (a) and amorphous precursor (b).

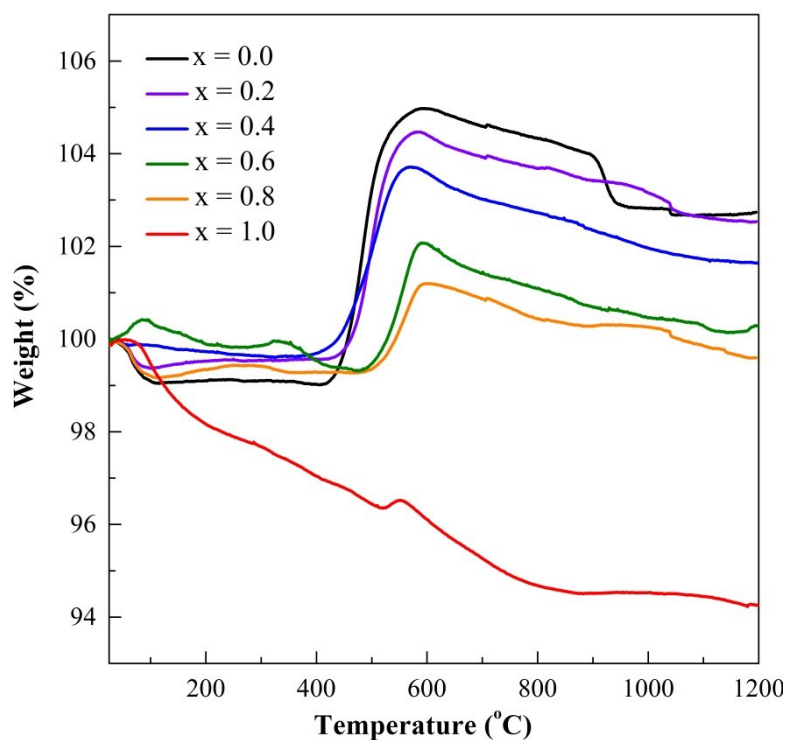

Figure S2. TGA curves of all samples in air.

Table S1. Refinements results from X-ray powder diffraction data and crystallite sizes calculated by Scherrer equation.

| x                                             | 0.0       | 0.2       | 0.4       | 0.6       | 0.8       | 1.0       |
|-----------------------------------------------|-----------|-----------|-----------|-----------|-----------|-----------|
| Mg/Nb $U_{iso}$ ( $\text{\AA}^2 \times 100$ ) | 2.55(1)   | 3.11(1)   | 1.07(2)   | 1.58(2)   | 0.96(1)   | 0.62(2)   |
| O1/N1 $U_{iso}$ ( $\text{\AA}^2 \times 100$ ) | 2.18(5)   | 2.95(7)   | 4.97(3)   | 2.52(6)   | 1.35(7)   | 1.16(5)   |
| O2/N2 $U_{iso}$ ( $\text{\AA}^2 \times 100$ ) | 6.27(3)   | 6.75(2)   | 3.09(3)   | 2.08(5)   | 0.75(5)   | 0.39(2)   |
| O1/N1 x                                       | 0         | 0         | 0         | 0         | 0         | 0         |
| O1/N1 y                                       | 0         | 0         | 0         | 0         | 0         | 0         |
| O1/N1 z                                       | 0.25      | 0.25      | 0.25      | 0.25      | 0.25      | 0.25      |
| O2/N2 x                                       | 0.7571(3) | 0.7757(5) | 0.7760(4) | 0.7700(4) | 0.7777(7) | 0.7796(6) |
| O2/N2 y                                       | 0.2571(1) | 0.2757(1) | 0.2760(2) | 0.2700(4) | 0.2777(5) | 0.2796(2) |
| O2/N2 z                                       | 0         | 0         | 0         | 0         | 0         | 0         |
| Nb(Mg)-O-Nb(Mg) angles ( $^\circ$ )           | 178.4(2)  | 174.1 (2) | 178.2 (1) | 175.4 (1) | 173.6 (2) | 173.2 (1) |
| Nb(Mg)-O bond distances ( $\text{\AA}$ )      | 2.023(1)  | 2.022(5)  | 2.015(1)  | 2.014(3)  | 2.012(2)  | 2.010(2)  |
| Mg SOF                                        | 0         | 0.06(2)   | 0.12(2)   | 0.19(2)   | 0.25(1)   | 0.32(1)   |
| crystallite sizes (nm)                        | 29.7(2)   | 22.9(1)   | 29.9(1)   | 20.5(2)   | 15.5(1)   | 15.0(1)   |

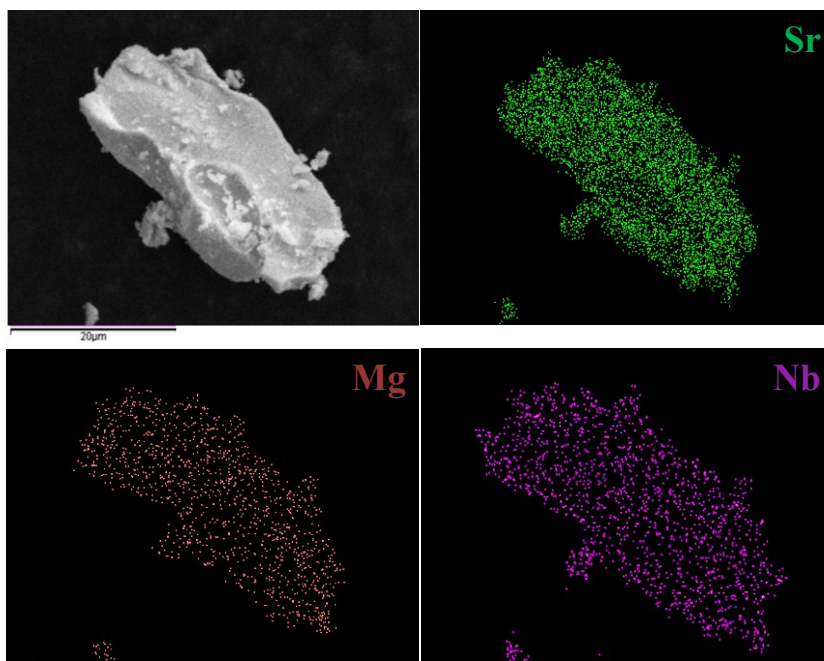

Figure S3. SEM-EDX mapping of particles of sample  $\text{SrMg}_{0.2}\text{Nb}_{0.8}\text{O}_{2+y}\text{N}_{1-y}$  ( $x = 0.6$ ), homogeneous Mg distribution can be identified.

Table S2 Atomic Compositions Analyzed by EDS

| Sample<br>x | Sr/<br>atom% | Nb/<br>atom% | Mg/<br>atom% | O/<br>atom% | N/<br>atom% |
|-------------|--------------|--------------|--------------|-------------|-------------|
| 0           | 17.4         | 17.7         | 0            | 46.1        | 18.8        |
| 0.2         | 18.1         | 16.3         | 0.9          | 48.0        | 16.7        |
| 0.4         | 17.1         | 16.3         | 2.5          | 51.6        | 12.5        |
| 0.6         | 16.2         | 13.9         | 3.5          | 57.5        | 8.9         |
| 0.8         | 14.2         | 11.0         | 4.1          | 67.8        | 2.8         |
| 1           | 18.6         | 12.3         | 5.3          | 62.8        | 1.0         |

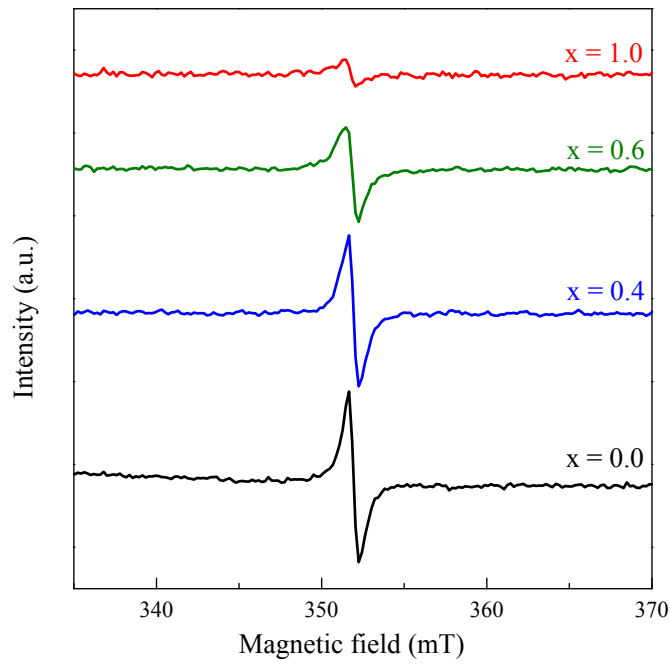

Figure S4. The electron paramagnet resonance (EPR) spectra of samples

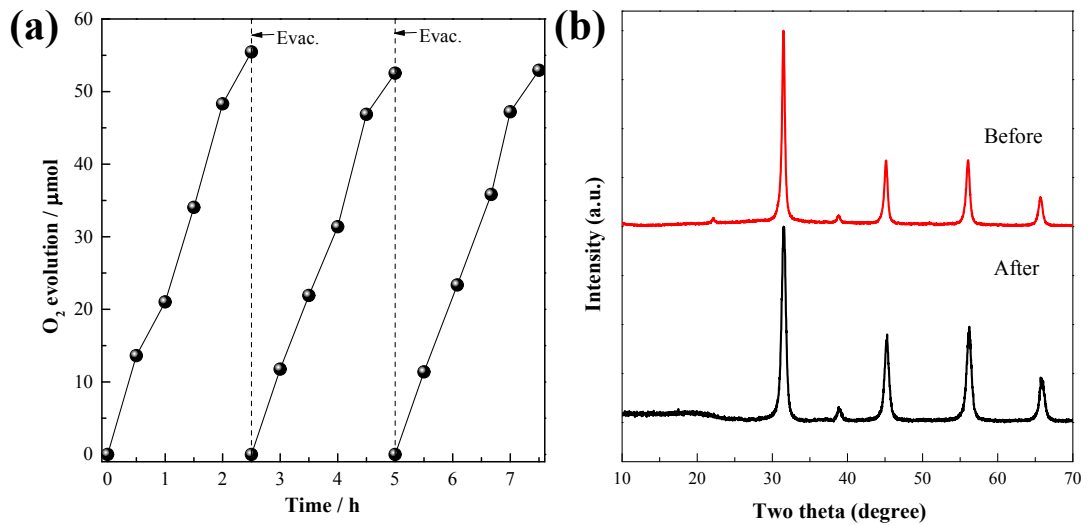

Figure S5 (a) Repeated photocatalytic oxygen evolution for  $\text{SrNb}_{0.8}\text{Mg}_{0.2}\text{O}_{2+y}\text{N}_{1-y}$  under visible light illumination ( $\lambda \geq 400 \text{ nm}$ ), sodium persulfate (0.05 M) was used as a sacrificial agent. (b) XRD patterns of  $\text{SrNb}_{0.8}\text{Mg}_{0.2}\text{O}_{2+y}\text{N}_{1-y}$  before and after photocatalytic experiment.

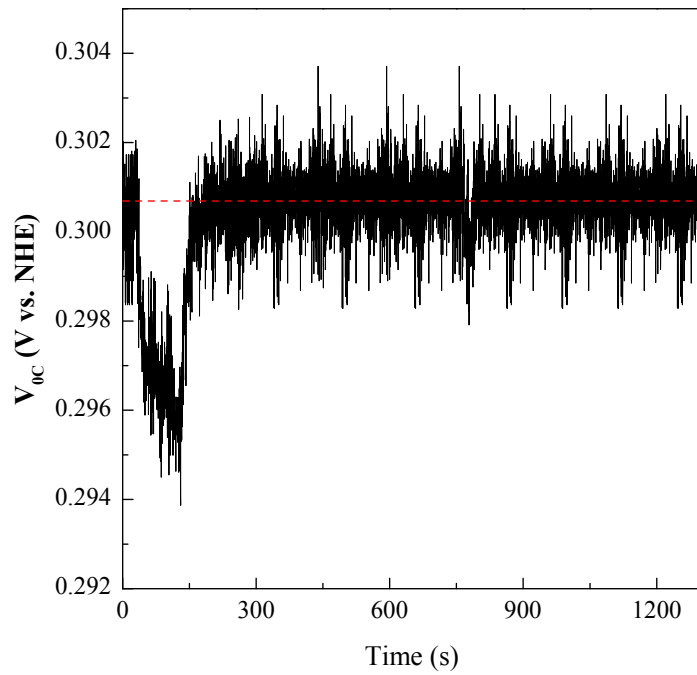

Figure S6  $V_{oc}$  time profile of  $TiO_2$  onto the electrodes prepared by  $TiCl_4$  methanol solution

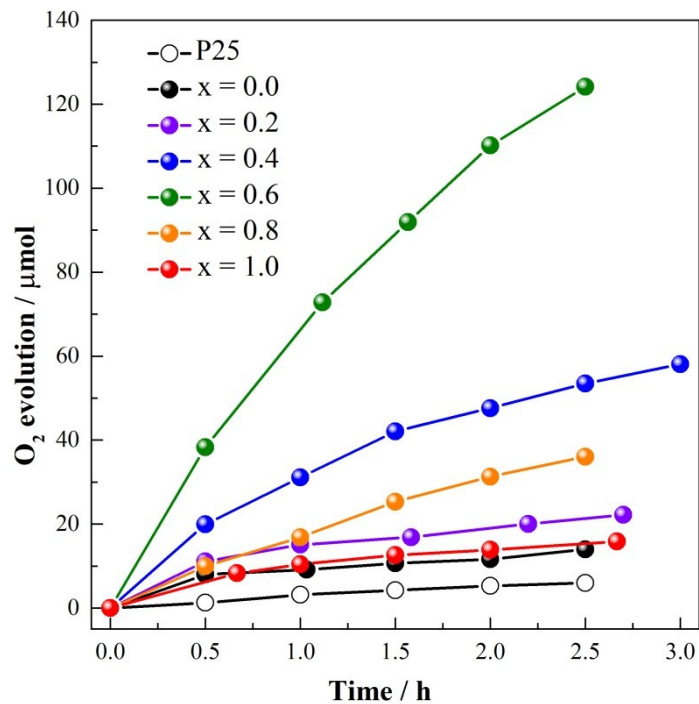

Figure S7 (a) Temporal photocatalytic oxygen evolution of as-prepared sample powders  $SrMg_{x/3}Nb_{1-x/3}O_{2+y}N_{1-y}$  ( $0 \leq x \leq 1$ ) and P25 for comparison under visible light illumination ( $\lambda \geq 400$  nm), 1 wt%  $CoO_x$  was loaded as a co-catalyst and 0.05

M AgNO<sub>3</sub> aqueous solution was used as a sacrificial reagent;
